# Supplementary material
Source: Research Square preprint supplement (doi:10.21203/rs.3.rs-9203836/v1)
Supplement: Supplementary file 1 [file db459800460df524578c3442.xlsx]

## Sheet: Antifungal Activity-Training
Mixture ray	p1, j	p2, j	MV(cm3/mol)	μ-	TopoPSA	GATS2v	nHBAcc	RESPONSE	Status
Teb-Thi-R1	0.06	0.94	222.549	-0.200259	158.062	0.813761	7.76	-0.73424	Training
Teb-Thi-R2	0.14	0.86	225.275	-0.199731	148.946	0.817555	7.44	-0.690816	Training
Teb-Thi-R3	0.24	0.76	228.683	-0.199071	137.55	0.822298	7.04	-0.651084	Training
Teb-Thi-R4	0.39	0.61	233.794	-0.19808	120.456	0.829412	6.44	-0.459242	Training
Teb-Thi-R5	0.61	0.39	241.291	-0.196628	95.3844	0.839845	5.56	-0.34733	Training
Dif-Thi-R1	0.97	0.03	309.373	-0.194179	61.595	0.80426	5.09	-0.379849	Training
Dif-Thi-R2	0.92	0.08	304.793	-0.194513	66.92	0.804603	5.24	-0.17406	Training
Dif-Thi-R4	0.75	0.25	289.218	-0.195648	85.025	0.80577	5.75	-0.11059	Training
Dif-Thi-R5	0.55	0.45	270.894	-0.196983	106.325	0.807142	6.35	-0.0305997	Training
Thio-Pro-R1	0.18	0.82	198.563	-0.208882	70.0014	0.828857	5.54	-0.41044	Training
Thio-Pro-R2	0.35	0.65	203.112	-0.207177	89.6755	0.825138	6.05	-0.61679	Training
Thio-Pro-R3	0.52	0.48	207.661	-0.205471	109.35	0.821418	6.56	-0.701827	Training
Thio-Pro-R5	0.84	0.16	216.224	-0.20226	146.383	0.814417	7.52	-0.869173	Training
Thi-Ipr-R3	0.73	0.27	216.345	-0.205261	139.201	0.798515	7.46	-0.559068	Training
Thi-Ipr-R4	0.84	0.16	218.04	-0.203385	149.671	0.803567	7.68	-0.609488	Training
Thi-Kre-R1	0.44	0.56	248.716	-0.194857	104.543	0.800229	4.64	-0.626853	Training
Thi-Kre-R2	0.24	0.76	258.792	-0.192786	82.9872	0.796413	3.44	-0.828273	Training
Thi-Kre-R4	0.07	0.93	267.356	-0.191026	64.6646	0.793169	2.42	-0.912913	Training
Dif-Teb-R2	0.9	0.1	306.368	-0.193987	57.654	0.809483	4.9	-0.470998	Training
Dif-Teb-R5	0.99	0.01	311.547	-0.19398	58.3254	0.804597	4.99	-0.660581	Training
Teb-Pro-R1	0.04	0.96	196.179	-0.210023	49.2408	0.833817	4.96	-0.138934	Training
Teb-Pro-R2	0.14	0.86	202.263	-0.20836	49.4178	0.836372	4.86	-0.123198	Training
Teb-Pro-R3	0.25	0.75	208.954	-0.20653	49.6125	0.839182	4.75	0.150458	Training
Teb-Pro-R4	0.4	0.6	218.08	-0.204035	49.878	0.843014	4.6	0.29073	Training
Teb-Pro-R5	0.63	0.37	232.071	-0.200209	50.2851	0.848889	4.37	0.304518	Training
Teb-Ipr-R1	0.15	0.85	212.521	-0.214167	66.903	0.778991	5.7	-0.166134	Training
Teb-Ipr-R2	0.3	0.7	219.943	-0.210617	64.086	0.792994	5.4	-0.164353	Training
Teb-Ipr-R5	0.81	0.19	245.179	-0.19855	54.5082	0.840604	4.38	-0.0759118	Training
Teb-Kre-R2	0.09	0.91	269.415	-0.190639	56.5638	0.797819	2.18	-0.832509	Training
Teb-Kre-R5	0.01	0.99	270.719	-0.190339	57.0582	0.792498	2.02	-0.9174	Training
Dif-Pro-R2	0.76	0.24	283.712	-0.197989	56.1848	0.810952	5	0.0533513	Training
Dif-Pro-R3	0.87	0.13	296.733	-0.196151	57.2001	0.80779	5	0.00988323	Training
Dif-Pro-R5	0.97	0.03	308.571	-0.19448	58.1231	0.804916	5	-0.283753	Training
Dif-Ipr-R1	0.77	0.23	287.507	-0.199439	61.0036	0.795069	5.23	-0.193403	Training
Dif-Ipr-R2	0.89	0.11	300.349	-0.19659	59.6452	0.799757	5.11	-0.237795	Training
Dif-Ipr-R3	0.94	0.06	305.701	-0.195403	59.0792	0.80171	5.06	-0.256718	Training
Dif-Ipr-R4	0.97	0.03	308.911	-0.194691	58.7396	0.802882	5.03	-0.327767	Training
Dif-Ipr-R5	0.99	0.01	311.052	-0.194217	58.5132	0.803663	5.01	-0.632559	Training
Dif-Kre-R1	0.83	0.17	305.111	-0.193354	58.1824	0.801976	4.49	-0.545555	Training
Dif-Kre-R2	0.65	0.35	297.688	-0.192692	57.952	0.799777	3.95	-0.557748	Training
Dif-Kre-R4	0.32	0.68	284.079	-0.191478	57.5296	0.795744	2.96	-0.834611	Training
Dif-Kre-R5	0.16	0.84	277.48	-0.19089	57.3248	0.793788	2.48	-1.0216	Training
Pro-Ipr-R1	0.34	0.66	201.239	-0.215327	62.733	0.788043	5.66	-0.26811	Training
Pro-Ipr-R4	0.83	0.17	195.676	-0.211883	52.6635	0.821268	5.17	-0.65244	Training
Pro-Ipr-R5	0.93	0.07	194.541	-0.21118	50.6085	0.828049	5.07	-0.687083	Training
Pro-Kre-R1	0.42	0.58	238.485	-0.198864	53.781	0.809037	3.26	-0.633468	Training
Pro-Kre-R2	0.22	0.78	202.601	-0.21617	65.199	0.779906	5.78	-0.700358	Training
Pro-Kre-R4	0.07	0.93	204.304	-0.217224	68.2815	0.769735	5.93	-0.830653	Training
Pro-Kre-R5	0.03	0.97	204.758	-0.217505	69.1035	0.767022	5.97	-0.937317	Training
Ipr-Kre-R2	0.1	0.9	264.304	-0.193043	58.38	0.789148	2.4	-0.95226	Training
Ipr-Kre-R3	0.05	0.95	267.593	-0.191672	57.75	0.790491	2.2	-1.00173	Training
Ipr-Kre-R4	0.03	0.97	268.909	-0.191124	57.498	0.791028	2.12	-1.1345	Training
Ipr-Kre-R5	0.01	0.99	270.224	-0.190575	57.246	0.791564	2.04	-1.15259	Training

## Sheet: Antifungal Activity-Prediction
Mixture ray	p1, j	p2, j	MV(cm3/mol)	μ-	TopoPSA	GATS2v	nHBAcc	RESPONSE	Status
Dif-Thi-R3	0.86	0.14	299.296	-0.194914	73.31	0.805015	5.42	-0.1529	Prediction
Thio-Pro-R4	0.68	0.32	211.942	-0.203866	127.866	0.817917	7.04	-0.758458	Prediction
Thi-Ipr-R5	0.93	0.07	219.427	-0.201849	158.237	0.807701	7.86	-0.61236	Prediction
Thi-Kre-R3	0.13	0.87	264.333	-0.191647	71.1314	0.794314	2.78	-0.858477	Prediction
Thi-Kre-R5	0.03	0.97	269.371	-0.190612	60.3534	0.792405	2.18	-1.04999	Prediction
Dif-Teb-R1	0.79	0.21	300.038	-0.193995	56.8334	0.815454	4.79	-0.148911	Prediction
Dif-Teb-R3	0.95	0.05	309.245	-0.193983	58.027	0.806768	4.95	-0.478133	Prediction
Dif-Teb-R4	0.97	0.03	310.396	-0.193981	58.1762	0.805683	4.97	-0.643453	Prediction
Teb-Ipr-R3	0.46	0.54	227.86	-0.206831	61.0812	0.807931	5.08	-0.0802656	Prediction
Teb-Ipr-R4	0.63	0.37	236.272	-0.202809	57.8886	0.823801	4.74	-0.0944711	Prediction
Teb-Kre-R1	0.2	0.8	267.622	-0.191052	55.884	0.805135	2.4	-0.615424	Prediction
Teb-Kre-R3	0.05	0.95	270.067	-0.190489	56.811	0.795158	2.1	-0.880356	Prediction
Teb-Kre-R4	0.03	0.97	270.393	-0.190414	56.9346	0.793828	2.06	-0.891482	Prediction
Dif-Pro-R1	0.56	0.44	260.037	-0.201331	54.3388	0.8167	5	0.185819	Prediction
Dif-Pro-R4	0.93	0.07	303.836	-0.195149	57.7539	0.806066	5	-0.00346053	Prediction
Dif-Kre-R3	0.49	0.51	291.09	-0.192103	57.7472	0.797821	3.47	-0.741309	Prediction
Pro-Ipr-R2	0.56	0.44	198.741	-0.213781	58.212	0.80296	5.44	-0.46449	Prediction
Pro-Ipr-R3	0.72	0.28	196.925	-0.212656	54.924	0.813809	5.28	-0.608526	Prediction
Pro-Kre-R3	0.13	0.87	203.623	-0.216802	67.0485	0.773803	5.87	-0.776701	Prediction
Ipr-Kre-R1	0.22	0.78	256.41	-0.196332	59.892	0.785927	2.88	-0.832509	Prediction

## Sheet: Honeybee Toxicity-Training
Component A	Component B	Vmax	dG	s+	-μ+	μ-	TopoPSA	RESPONSE	Status
Acetamiprid	Tribufos/Butifos	-2.09512	-21.6002	3.03295	0.206732	-0.413203	155.06	-0.378	Training
Acetamiprid	Propiconazole	-2.06563	-26.5174	4.33253	0.205351	-0.411676	101.45	1.155	Training
Acetamiprid	Triadimefon	-2.00918	-29.8093	3.74893	0.208205	-0.396522	109.29	1.097	Training
Imidacloprid	Fenbuconazole	-1.9731	-34.754	3.40252	0.200897	-0.413742	138.16	0.523	Training
Coumaphos	diethyl but-2-enedioate	-2.10298	-16.4697	2.49025	0.282855	-0.463113	148.49	-1.299	Training
Coumaphos	Piperonyl butoxide	-2.10601	-22.7554	5.38844	0.206206	-0.383027	142.04	-0.702	Training
Coumaphos	Fluvalinate	-2.01877	-21.3981	2.43028	0.226287	-0.397977	167.24	-1.322	Training
Coumaphos	Fluvalinate	-2.01877	-21.3981	2.43028	0.226287	-0.397977	167.24	-1.106	Training
Coumaphos	Fluvalinate	-2.01877	-21.3981	2.43028	0.226287	-0.397977	167.24	-0.782	Training
Coumaphos	Fluvalinate	-2.01877	-21.3981	2.43028	0.226287	-0.397977	167.24	-0.782	Training
Fluvalinate	Coumaphos	-2.01877	-21.3981	2.43028	0.226287	-0.397977	167.24	-0.788	Training
Fluvalinate	Coumaphos	-2.01877	-21.3981	2.43028	0.226287	-0.397977	167.24	-0.517	Training
Fluvalinate	Coumaphos	-2.01877	-21.3981	2.43028	0.226287	-0.397977	167.24	-0.428	Training
Fluvalinate	Coumaphos	-2.01877	-21.3981	2.43028	0.226287	-0.397977	167.24	-0.185	Training
Fluvalinate	Fenpyroximate	-2.05093	-22.6255	2.52171	0.20785	-0.379547	146.29	-0.38	Training
Fluvalinate	Thymol	-1.93298	-13.2631	4.60941	0.170451	-0.362175	91.58	-1.009	Training
Fluvalinate	Pyraclostrobin	-2.01355	-24.0851	2.65406	0.186841	-0.370719	136.65	-0.646	Training
Fluvalinate	Boscalid	-1.92932	-22.2974	3.33731	0.206084	-0.386037	113.34	-1.064	Training
Fluvalinate	Diethyl 2-betenedioate	-2.05751	-17.1863	2.59158	0.249325	-0.439286	123.95	-0.917	Training
Fluvalinate	Tribufos/Butifos	-2.05855	-17.7743	2.73454	0.198519	-0.39929	174.13	-0.292	Training
Coumaphos	Fluvalinate	-2.01877	-21.3981	2.43028	0.226287	-0.397977	167.24	-0.813	Training
Coumaphos	Fenpyroximate	-2.0964	-21.9089	2.42037	0.24138	-0.403374	170.83	-0.615	Training
Coumaphos	Amitraz	-2.08134	-16.9579	2.15154	0.223356	-0.387682	123.85	-0.964	Training
Coumaphos	Oxalic acid	-1.91098	-23.1263	2.26397	0.275181	-0.466112	170.49	-1.167	Training
Coumaphos	Boscalid	-1.97479	-21.5807	3.23598	0.239614	-0.409863	137.88	-1.354	Training
Coumaphos	Tribufos/Butifos	-2.10402	-17.0576	2.6332	0.232049	-0.423116	198.67	-0.863	Training
Fenpyroximate	Fluvalinate	-2.05093	-22.6255	2.52171	0.20785	-0.379547	146.29	-0.744	Training
Fenpyroximate	Coumaphos	-2.0964	-21.9089	2.42037	0.24138	-0.403374	170.83	-0.307	Training
Fenpyroximate	Amitraz	-2.1135	-18.1853	2.24297	0.20492	-0.369252	102.9	-0.255	Training
Fenpyroximate	Thymol	-2.01061	-13.7739	4.5995	0.185544	-0.367572	95.17	-0.567	Training
Fenpyroximate	Boscalid	-2.00695	-22.8081	3.32741	0.221177	-0.391433	116.93	-0.751	Training
Fenpyroximate	Diethyl 2-betenedioate	-2.13514	-17.6971	2.58168	0.264418	-0.444683	127.54	-0.641	Training
Fenpyroximate	Piperonyl butoxide	-2.13817	-23.9828	5.47987	0.187769	-0.364597	121.09	0.569	Training
Amitraz	Fluvalinate	-2.03587	-17.6745	2.25288	0.189826	-0.363856	99.31	-0.688	Training
Amitraz	Coumaphos	-2.08134	-16.9579	2.15154	0.223356	-0.387682	123.85	-0.436	Training
Amitraz	Fenpyroximate	-2.1135	-18.1853	2.24297	0.20492	-0.369252	102.9	-0.66	Training
Amitraz	Pyrachlostrobin	-2.07611	-19.6449	2.37533	0.183911	-0.360424	93.26	-0.215	Training
Amitraz	Boscalid	-1.99188	-17.8571	3.05858	0.203154	-0.375742	69.95	-0.683	Training
Amitraz	Prochloraz	-2.07566	-20.4751	3.10428	0.198362	-0.387586	75.32	-0.394	Training
Amitraz	Diethyl 2-betenedioate	-2.12008	-12.746	2.31285	0.246395	-0.428991	80.56	-0.362	Training
Amitraz	Piperonyl butoxide	-2.1231	-19.0318	5.21104	0.169746	-0.348906	74.11	-0.382	Training
Thymol	Fluvalinate	-1.93298	-13.2631	4.60941	0.170451	-0.362175	91.58	-1.207	Training
Thymol	Coumaphos	-1.97845	-12.5465	4.50807	0.203981	-0.386002	116.12	-1.31	Training
Thymol	Fenpyroximate	-2.01061	-13.7739	4.5995	0.185544	-0.367572	95.17	-1.543	Training
Thymol	Oxalic acid	-1.82519	-14.9913	4.4431	0.219345	-0.430311	94.83	-1.487	Training
Thymol	Pyrachlostrobin	-1.97323	-15.2335	4.73185	0.164535	-0.358744	85.53	-1.45	Training
Thymol	Prochloraz	-1.97277	-16.0637	5.46081	0.178986	-0.385906	67.59	-1.591	Training
Thymol	Diethyl 2-betenedioate	-2.01719	-8.33464	4.66938	0.227019	-0.427311	72.83	-1.806	Training
Thymol	Tribufos/Butifos	-2.01823	-8.92262	4.81233	0.176213	-0.387314	123.01	-1.545	Training
Thymol	Piperonyl butoxide	-2.02021	-14.6204	7.56757	0.15037	-0.347225	66.38	-1.511	Training
Fluvalinate	Propiconazole	-2.02906	-22.6914	4.03412	0.197139	-0.397763	120.52	-0.776	Training
Fluvalinate	Myclobutanil	-1.98933	-24.4692	3.13011	0.190535	-0.391168	125.85	-0.574	Training
Fluvalinate	Piperonyl butoxide	-2.06054	-23.4721	5.48977	0.172676	-0.359201	117.5	-0.188	Training
Fluvalinate	Prochloraz	-2.0131	-24.9153	3.38301	0.201292	-0.397881	118.71	0.658	Training
Fluvalinate	Fenbuconazole	-2.00445	-26.9165	3.23835	0.185923	-0.38323	125.85	0.26	Training
Fluvalinate	Metconazole	-1.92036	-26.609	3.48942	0.183406	-0.380553	122.29	0.347	Training
Fluvalinate	Diethyl 2-betenedioate	-2.05751	-17.1863	2.59158	0.249325	-0.439286	123.95	-0.917	Training
Fluvalinate	Tribufos/Butifos	-2.05855	-17.7743	2.73454	0.198519	-0.39929	174.13	-0.292	Training
Phenothrin	Amitraz	-2.12668	-13.7526	2.47793	0.178641	-0.362855	63.49	0.444	Training
Phenothrin	Amitraz	-2.12668	-13.7526	2.47793	0.178641	-0.362855	63.49	0.252	Training
Phenothrin	Amitraz	-2.12668	-13.7526	2.47793	0.178641	-0.362855	63.49	0.444	Training

## Sheet: Honeybee Toxicity-Prediction
Component A	Component B	Vmax	dG	s+	-μ+	μ-	TopoPSA	RESPONSE	Status
Acetamiprid	Epoxiconazole	-2.0585	-27.6569	3.06226	0.198419	-0.405011	95.52	0.301	Prediction
Acetamiprid	Uniconazole	-2.02213	-26.2971	3.79929	0.208915	-0.400778	103.22	-0.049	Prediction
Thiacloprid	Acetamiprid	-2.0167	-29.963	3.26542	0.212945	-0.4088	129.86	1.046	Prediction
Coumaphos	Tribufos/Butifos	-2.10402	-17.0576	2.6332	0.232049	-0.423116	198.67	-0.863	Prediction
Fluvalinate	Amitraz	-2.03587	-17.6745	2.25288	0.189826	-0.363856	99.31	-0.573	Prediction
Fluvalinate	Oxalic acid	-1.86552	-23.8429	2.36531	0.241651	-0.442286	145.95	-0.848	Prediction
Coumaphos	Thymol	-1.97845	-12.5465	4.50807	0.203981	-0.386002	116.12	-1.364	Prediction
Coumaphos	Diethyl 2-betenedioate	-2.10298	-16.4697	2.49025	0.282855	-0.463113	148.49	-1.299	Prediction
Coumaphos	Piperonyl butoxide	-2.10601	-22.7554	5.38844	0.206206	-0.383027	142.04	-0.702	Prediction
Fenpyroximate	Oxalic acid	-1.94315	-24.3537	2.3554	0.256744	-0.447683	149.54	-0.176	Prediction
Fenpyroximate	Pyrachlostrobin	-2.09118	-24.5959	2.64415	0.201934	-0.376116	140.24	-0.32	Prediction
Fenpyroximate	Prochloraz	-2.09073	-25.4261	3.37311	0.216385	-0.403278	122.3	0.602	Prediction
Fenpyroximate	Tribufos/Butifos	-2.13618	-18.2851	2.72463	0.213612	-0.404686	177.72	-0.1	Prediction
Amitraz	Thymol	-1.99555	-8.82284	4.33067	0.16752	-0.35188	48.19	-0.592	Prediction
Amitraz	Oxalic acid	-1.92808	-19.4027	2.08657	0.23872	-0.431991	102.56	-1.164	Prediction
Amitraz	Tribufos/Butifos	-2.12112	-13.334	2.4558	0.195589	-0.388995	130.74	-0.336	Prediction
Thymol	Amitraz	-1.99555	-8.82284	4.33067	0.16752	-0.35188	48.19	-1.635	Prediction
Thymol	Boscalid	-1.88899	-13.4457	5.41511	0.183778	-0.374061	62.22	-1.673	Prediction
Fluvalinate	Prochloraz	-2.0131	-24.9153	3.38301	0.201292	-0.397881	118.71	-0.667	Prediction
Fluvalinate	Metconazole	-1.92036	-26.609	3.48942	0.183406	-0.380553	122.29	-0.717	Prediction
Fluvalinate	Propiconazole	-2.02906	-22.6914	4.03412	0.197139	-0.397763	120.52	0.131	Prediction
Phenothrin	Piperonyl butoxide	-2.15135	-19.5501	5.71483	0.16149	-0.3582	81.68	0.62	Prediction
Phenothrin	Piperonyl butoxide	-2.15135	-19.5501	5.71483	0.16149	-0.3582	81.68	0.495	Prediction
Phenothrin	Piperonyl butoxide	-2.15135	-19.5501	5.71483	0.16149	-0.3582	81.68	0.62	Prediction
